# Supplementary material for: Circulating Fibroblast Growth Factor-23 Levels Can Predict Rapid Kidney Function Decline in a Healthy Population: A Community-Based Study
Source: MDPI journal article supplement (doi:10.3390/biom13010031), 2022-12-24
Supplement: s1 [file s1]

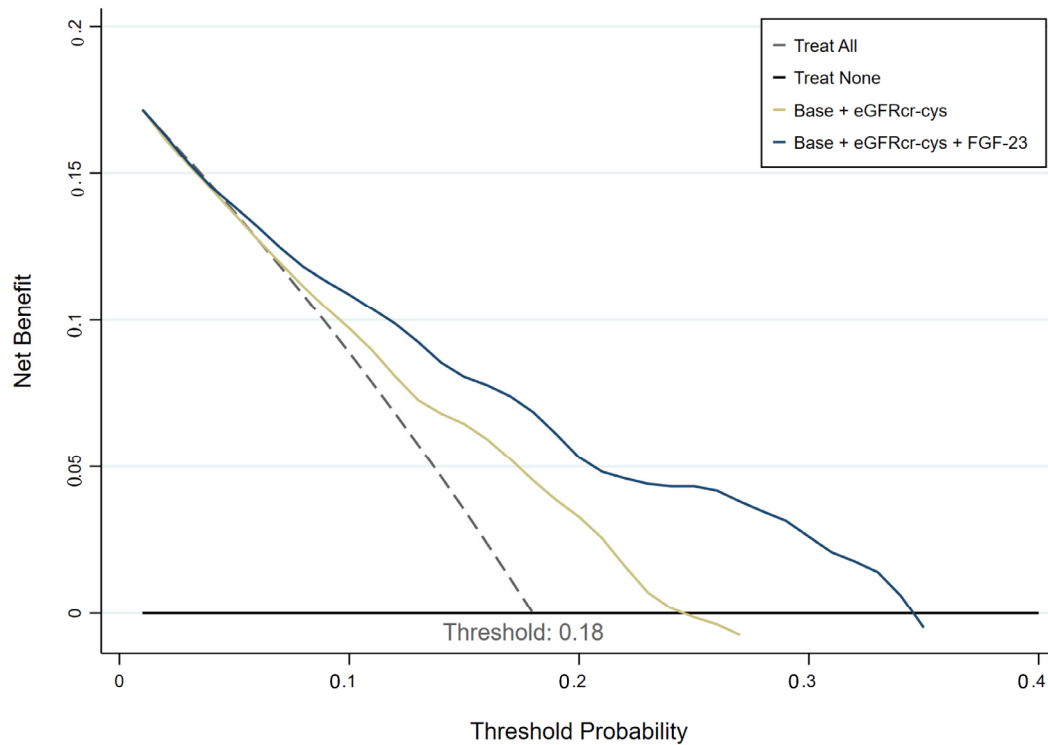

**Supplemental Figure S1. DCA plot to assess the clinical consequences of screening patients for the risk of RKFD using FGF-23 and eGFRcr-cys.** Y-axis is the net benefit of the decision strategy. Net benefit was defined as the net proportion of subjects with RKFD in whom a prediction model would provide benefit without applying a prediction model to subjects with good outcomes. For the subjects who did not develop RKFD (solid black line), forecasting with a combination of FGF-23 and eGFRcr-cys did not yield a net benefit. However, when considering those who developed RKFD (grey dash line), using FGF-23 in addition to eGFRcr-cys would increase the benefit of using eGFRcr-cys on the basis of subjects' baseline features. The net benefit was calculated as  $((\text{proportion of true positives}) - (\text{proportion of false positives}) \times \text{pt}) / (1 - \text{pt})$ , where pt is the threshold probability (0.18).

**Abbreviations:** DCA, decision curve analysis; FGF-23, fibroblast growth factor-23; RKFD, rapid kidney function decline

## Changes on eGFR

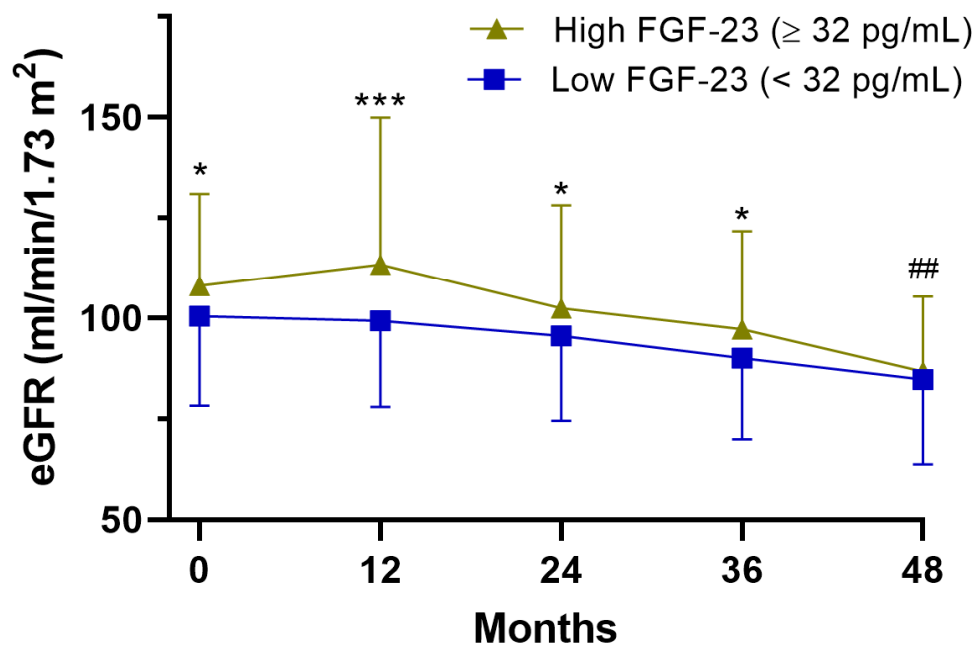

**Supplemental Figure S2.** Changes in eGFR according to the serum levels of FGF-23 during the study.

**Abbreviations:** eGFR, estimated glomerular filtration rate; FGF-23, fibroblast growth factor-23; RKFD, rapid kidney function decline; UACR, urine albumin-to-creatinine ratio

## P value < 0.01 when comparing the eGFR value of baseline to the end of the follow-up period.

\* P value < 0.05 between high and low FGF-23

\*\*\* P value < 0.001 between high and low FGF-23

**Supplemental Table S1. Social psychology variables of the study population.**

|                       | Total<br>(n=220) | RKFD<br>(n=110) | No RKFD<br>(n=110) | p-value |
|-----------------------|------------------|-----------------|--------------------|---------|
| Education level       |                  |                 |                    | 0.48    |
| Illiterate, n         | 20 (9.2%)        | 10 (9.2%)       | 10 (9.3%)          |         |
| Elementary school, n  | 51 (23.5%)       | 31 (28.4%)      | 20 (18.5%)         |         |
| Junior high school, n | 42 (19.4%)       | 22 (20.2%)      | 20 (18.5%)         |         |
| Senior high school, n | 71 (32.7%)       | 31 (28.4%)      | 40 (37.0%)         |         |
| Undergraduate, n      | 30 (13.8%)       | 13 (11.9%)      | 17 (15.7%)         |         |
| Postgraduate, n       | 3 (1.4%)         | 2 (1.8%)        | 1 (0.9%)           |         |
| Substance habituation |                  |                 |                    |         |
| Smoking, n            | 26 (11.9%)       | 12 (11.1%)      | 14 (12.7%)         | 0.71    |
| Betel nut, n          | 5 (2.3%)         | 4 (3.7%)        | 1 (0.9%)           | 0.17    |
| Alcohol, n            | 41 (21.6%)       | 18 (18.8%)      | 23 (24.5%)         | 0.34    |
| Dietary habits        |                  |                 |                    | 0.95    |
| Non-vegetarian, n     | 180 (82.6%)      | 89 (82.4%)      | 91 (82.7%)         |         |
| Vegetarian, n         | 38 (17.4%)       | 19 (17.6%)      | 19 (17.3%)         |         |

Abbreviations: RKFD, rapid kidney function decline

**Supplemental Table S2. Hazard ratios estimated by the Cox regression.**

|                   | <b>HR (95% CI)</b> | <b><i>p</i>-value</b> | <b>aHR (95% CI)</b> | <b><i>p</i>-value</b> |
|-------------------|--------------------|-----------------------|---------------------|-----------------------|
| FGF-23 < 32 pg/mL | reference          |                       | reference           |                       |
| FGF-23 ≥ 32 pg/mL | 1.80 (1.22, 2.65)  | 0.003                 | 2.50 (1.30, 4.79)   | 0.006                 |

Covariates used in adjusted Cox regression: sex, hypertension, DM, CKD, cardiovascular disease, CVA, HBV, HCV, gout, autoimmune disease, metabolic syndrome, BMI, central obesity, Hgb, total cholesterol, LDL cholesterol, HDL cholesterol, triglyceride, BUN, eGFRcr-cys, uric acid, albumin, GPT, UACR, fasting glucose, HbA1C, insulin, HOMA-IR, total vitamin D, iPTH, P, Ca, OHA use, anti-hypertensives, pain killer use, and dietary habits.

**Supplemental Table S3. NRI and IDI analyses for the role of FGF-23 in stratifying individuals into high or low-risk categories (re-classification).**

|                                                      |                       |
|------------------------------------------------------|-----------------------|
|                                                      | Model with FGF-23     |
|                                                      | Re-classification (%) |
| Subjects without RKFD                                |                       |
| increased probabilities                              | 30.77                 |
| decreased probabilities                              | 69.23                 |
| Subjects with RKFD                                   |                       |
| increased probabilities                              | 50.00                 |
| decreased probabilities                              | 50.00                 |
| NRI: 0.384 (Standard error: 0.172), p-value: 0.026   |                       |
| IDI: 0.073 (Standard error: 0.017), p-value: <0.0001 |                       |

**Abbreviations:** IDI, integrated discrimination improvement; NRI, net reclassification improvement.

**Supplemental Table S4. Subgroup analysis of RKFD compared with low (< 32 pg/mL) and high levels (≥ 32 pg/mL) of FGF-23.**

|                        | HR (95%CI)        | p-value | Wald test |
|------------------------|-------------------|---------|-----------|
| Age, years             |                   |         | 0.020     |
| ≤60                    | 2.14 (1.27-3.59)  | 0.004   |           |
| >60                    | 1.47 (0.79-2.71)  | 0.221   |           |
| Gender                 |                   |         | 0.029     |
| Female                 | 1.78 (1.14-2.77)  | 0.011   |           |
| Male                   | 1.94 (0.84-4.50)  | 0.121   |           |
| Hypertension           |                   |         | 0.004     |
| no                     | 1.88 (1.18-2.98)  | 0.007   |           |
| yes                    | 1.84 (0.88-3.87)  | 0.105   |           |
| Diabetes               |                   |         | 0.004     |
| no                     | 1.73 (1.13-2.65)  | 0.011   |           |
| yes                    | 2.09 (0.79-5.57)  | 0.139   |           |
| Metabolic syndrome     |                   |         | <0.001    |
| no                     | 2.22 (1.37-3.61)  | 0.001   |           |
| yes                    | 1.29 (0.66-2.51)  | 0.461   |           |
| Cardiovascular disease |                   |         | 0.009     |
| no                     | 1.63 (1.08-2.47)  | 0.020   |           |
| yes                    | 4.69 (1.30-16.90) | 0.018   |           |
| Gout                   |                   |         | 0.021     |
| no                     | 1.72 (1.15-2.58)  | 0.008   |           |
| yes                    | 3.79 (0.42-33.99) | 0.234   |           |

**Abbreviation:** HR, hazard ratio

**Supplemental Table S5. Sensitivity analysis for risk estimation of FGF-23  $\geq$  32 pg/mL.**

|                                 | Unadjusted       |         | Adjusted          |         |
|---------------------------------|------------------|---------|-------------------|---------|
|                                 | HR (95%CI)       | p-value | HR (95%CI)        | p-value |
| Different PS modeling           |                  |         |                   |         |
| With IPTW (n= 220)              | 1.42 (0.92-2.19) | 0.110   | 2.20 (1.33-3.64)  | 0.002   |
| With stratification (n= 220)    | 1.96 (1.27-3.03) | 0.002   | 3.47 (1.93-6.24)  | <0.001  |
| With overlap weighting (n= 220) | 1.87 (1.24-2.82) | 0.003   | 3.69 (2.08-6.53)  | <0.001  |
| 1:1 PSM (n= 96)                 | 1.74 (1.05-2.87) | 0.030   | 7.82 (2.66-22.98) | <0.001  |

**Abbreviations:** HR, hazard ratio; IPTW, inverse probability of treatment weighting; PS, propensity score; PSM propensity score matching
